# Supplementary material for: Cyanophage-encoded auxiliary metabolic genes in modulating cyanobacterial metabolism and algal bloom dynamics
Source: Frontiers journal article supplement (doi:10.3389/fviro.2024.1461375), 2024-10-01
Supplement: Table_1.xlsx [file Table_1.xlsx]

## Sheet: cyanophages and their taxonomy
Cyano-phage	Genome Size	Host	Taxonomy	vAMG	Function	Position in Genome (bp)	Ref
						(start - end)
P-SSP7	45.2 kb	Prochlorococcus	Autographiviridae	psbA	Photosystem II proteins; enhance photosynthetic efficiency	19242-20321	(Sabehi and Lindell, 2012, Dwivedi et al., 2013a)
				HliP	High light-inducible proteins	19050-19241
				nrdJ, nrdB	Nucleotide metabolism	14128-15534, 15531-16244
				talC	Transaldolase; reprogram carbon metabolism	44319-44963
S-PM2	196.3 kb	Synechococcus	Kyanoviridae	Hli03	High light-inducible proteins	124362-124556 & 124839-124958	(Mann et al., 2005)
				CobS	vitamin B12 metabolism	90585-91703
				mazG	Stress response regulator	102297-102704
				nrdB, nrdA, nrdC	Nucleotide metabolism	nrdB (106558-106833, 113860-115044)
						nrdA (111549-113879)
						nrdC (120348-120593, 139430-139678)
				psbA, psbD	Photosystem II proteins; enhance photosynthetic efficiency	psbA (135326-136617, 136328-136540)
						psbD (137820-138881)
				CpeT,	Light harvesting, and Phosphorus acquisition capabilities,	CpeT (163952-164479)
				phoH		phoH (143879-144631)
Syn9	177.3 kb	Synechococcus	Kyanoviridae	psbA, psbD	Photosystem II proteins; enhance photosynthetic efficiency	psbA (165949-167085)	(Weigele et al., 2007)
						psbD (167261-168316)
				CpeT	Light harvesting	15497-15982
				nrdA	Nitrogen & nucleotide metabolism	156351-158654
				ThyX	Nucleotide Metabolism	174751-175461
				NAD synthetase	Regulate physiological processes	161618-162085
				PetE,	Nutrient acquisition, and light harvesting capabilities	petE (104839-105162),
				PhoH,		phoH (175876-176640),
				hli		hli (163373-163697)
				mazG-like pyrophosphatase	Helps in nucleotide metabolism	146048-146449
Syn5	46.2 kb	Synechococcus	Autographiviridae	ThyX	Nucleotide metabolism	45229-45720	(Pope et al., 2007a, Pope et al., 2007b)
				nrd		14570-15964
S-WHM1	4 kb	Synechococcus	Caudoviricetes	psbA, psbD	Photosystem II proteins; enhance photosynthetic efficiency	psbA (1112-2194)
						psbD (2370-3425)
							(Clokie and Mann, 2006b)
P-SSM2	252.4 kb	Prochlorococcus	Kyanoviridae	psbA, hli, mazG, pstS, talc, petE, nifU, phoH	Optimizes photosynthetic efficiency and enhances light-harvesting and nutrient acquisition capabilities, also regulate stress responses	psbA (211519-212601)	(Sullivan et al., 2010)
						hli03 (205630- 205962, 206007-206114)
						hli04 (206114-206227)
						hli05 (206227-206370)
						hli06 (206951-207055)
						mazG (155057-155473)
						pstS (189748-190713)
						talC (187370-188017)
						petE (181103-181447)
						nifU (180489-180779)
						phoH (247599-248351)
P-HM2	183.8 kb	Prochlorococcus	Caudoviricetes	psbA, psbD, CpeT, mazG, hli, talC, phoH, cobS, nrdA, nrdB, nrdC	Enhances photosynthetic processes and manages stress response, nucleotide metabolism, phosphorus acquisition, vitamin B12 metabolism, and light harvesting capabilities	psbA (171763-172851)	(Sullivan et al., 2010, Huang et al., 2021)
						psbD (172912-173988)
						CpeT (19862-20266)
						mazG (142606-143010)
						hli03 (168183- 168493, 168520-168627)
						hli04 (168549-168749)
						talC (177517-178191)
						phoH (182138-182884)
						cobS (127441-128505)
						nrdA (153678-155978)
						nrdB (155957-157141)
						nrdC (179307-179567)
S-SSM5	176.2 kb	Synechococcus	Kyanoviridae	psbA, psbD, hli, phoH, gnd, talc, cpeT, petE, pstS	Protects photosynthetic apparatus and reprograms carbon and phosphorus metabolism	psbA (164719-165795)	(Huang et al., 2021, Sullivan et al., 2010)
						psbD (166122-167177)
						phoH (173337-174098)
						hli (162722-162940, 162974-163081)
						gnd (103077-104117)
						talc (160088-160768)
						cpeT (14864-15322)
						petE (102087-102410)
						pstS (138186-139166)
						mazG (145578-145979)
Pan1	72kb	Pseudanabaena sp. Chao 1811	Caudoviricetes	nrd	Nucleotide Metabolism	6574-8508	(Zhu et al., 2023b)
				phoH	Phosphorus acquisition	13019-13765
				QueF	Queuosine synthesis	45475-45948
				QueC		44054-44887
				QueD		42523-42969
				phosphoglycolate phosphatase(PGP)	involved in the photorespiratory pathway	41946-42521
				Thymidylate synthase	Nucleotide Metabolism	34161-35009
Pam2	142kb	Pseudanabaena mucicola Chao 1806	Caudoviricetes	GH	Carbohydrate metabolism	13173-13925	(Du et al., 2022)
				dUTPase	nucleotide metabolism and DNA maintenance	Complement 108170-108829
				nrdB, nrdA	Nucleotide Metabolism	nrdB (Complement 94287-95420)
						nrdA (Complement 95423-97666)
				dNMP kinase		Complement102669-103325
				nitrogen regulatory protein P-II	Nitrogen acquisition	Complement (124151-124594, 133274-133582)
				PhoH	Phosphate acquisition	Complement 81926-82618
Pam3	54.5 kb	Pseudanabaena mucicola Chao 1806	Caudoviricetes	nrd class II	Nucleotide Metabolism, and Stress response regulation	27609-29351	(Du et al., 2022)
				Nt5c		41222-41749
				MazG		48675-49193
				NTPPHase		44890-45285
				ThyA		40198-41235
P-SSP10	47.3kb	Prochlorococcus marinus str. NATL2A	Autographiviridae	psbA, hliP, nrd, talC	Enhances photosynthetic processes and manages stress response while enhancing the light harvesting capabilities	psbA (Complement 17786-18862)	(Labrie et al., 2013)
						hliP (Complement18878-19054)
						nrd (Complement22882-24261)
						talC (Complement40906-41571)
KBS-P-1A	45.7kb	Synechococcus sp.	Autographiviridae	ThyA	nucleotide metabolism	(22708-23334)	(Ruo Han Wang, 2023)
				NTPPHase		(34822-35190)
				Nrd, nrdB		Nrd (35190-36554)
						nrdB (36551-37267)
				hliP	Light harvest	40125-40322
				psbA	Photosynthesis	41189-42265
S-RIP1	44.9kb	Synechococcus sp.	Autographiviridae	ThyA	Nucleotide Metabolism	22103-22748	(Zhao et al., 2013)
				NTPPHase		35445-35801
				Nrd , nrdB		Nrd (35785-37176)
						nrdB (37194-37889)
				hliP	Light harvest	hliP (40780-40974)
				psbA	Photosynthesis	42244-43320
P-SSP9	46.9kb	Prochlorococcus marinus subsp. marinus str. CCMP1375	Autographiviridae	Nrd, nrdB	Nucleotide Metabolism	nrdB (complement (38732-39454))	(Labrie et al., 2013)
						nrd (complement(39454-40884))
uncultured phage_MedDCM-OCT-S45-C4	44.7kb	Prochlorococcus marinus	Autographiviridae	ThyA	Nucleotide Metabolism	complement(4113-4784)	(Mizuno et al., 2013)
				nrdB, Nrd		nrdB (complement (35176-35889))
						nrd (complement(35886-37253))
				psbA	Photosynthesis	complement(29830-30906)
				hliP	Light harvest	complement(31852-32043)
Uncultured phage_MedDCM-OCT-S28-C3	43.4kb	Prochlorococcus marinus	Autographiviridae	NrdB	Nucleotide metabolism	complement(41565-42281)	(Mizuno et al., 2013)
S-TIP37	45.4kb	Synechococcus sp.	Autographiviridae	Nrd, nrdB	Nucleotide Metabolism	Nrd (13210-14598)	(Shitrit et al., 2022)
						nrdB (14595-15308)
				thyX		44599-45228
				psbA	Photosynthesis	19251-20327
				hli	Light harvest	18055-18249
S-B28	45.4kb	Synechococcus sp.	Autographiviridae	psbA	Photosynthesis	Complement (22902-23981)	(Ruo Han Wang, 2023)
				hliP-T4	Light harvest	Complement (24991-25122)
				ThyX	Nucleotide Metabolism	Complement (42771-43409)
				nrdB, Nrd		nrdB (complement (28911-29627))
						nrd (complement(29624-30994))
				nucleotide pyrophosphohydrolase		complement(30987-31271)
				nrdA		complement(23978-24127)
IMGVR_UViG_3300008108_000152|3300008108|Ga0114341_10000679	60.7kb	Pseudanabaena	Caudoviricetes	Nucleotide pyrophosphohydrolase	Nucleotide Metabolism	Complement 56827-57159	(Ruo Han Wang, 2023)
IMGVR_UViG_3300021585_000134|3300021585|Ga0226666_1000032	61kb	Pseudanabaena	Caudoviricetes	Nucleotide pyrophosphohydrolase	Nucleotide Metabolism	Complement 38762-39094	(Ruo Han Wang, 2023)
IMGVR_UViG_3300027816_000012|3300027816|Ga0209990_10000204	61kb	Pseudanabaena	Caudoviricetes	Nucleotide pyrophosphohydrolase	Nucleotide Metabolism	Complement 38798-39130	(Ruo Han Wang, 2023)
IMGVR_UViG_3300034023_000877|3300034023|Ga0335021_0000021	99.8kb	Planktothrix	Caudoviricetes	thymidylate kinase	Nucleotide Metabolism	Complement 48477-49073	(Ruo Han Wang, 2023)
IMGVR_UViG_3300008264_000001|3300008264|Ga0114353_1000019	98.3kb	Dolichospermum	Caudoviricetes	TMPK	Nucleotide metabolism	64021-64647	(Ruo Han Wang, 2023)
				ThyA		87139-88584
				alpha-ribazole phosphatase (CobC)	Vitamin B12 metabolism	12715-13896
IMGVR_UViG_3300042396_000723|3300042396|Ga0453984_0000017	96.1kb	Planktothrix	Caudoviricetes	Thymidylate Kinase (TMPK)	Nucleotide metabolism	Complement 55123-55719	(Ruo Han Wang, 2023)
Station58_DCM_ALL_assembly_NODE_104_length_45231_cov_9	45kb	Prochlorococcus marinus	Caudovirales	hliP	light inducible protein	Complement (15438-15626)	(Ruo Han Wang, 2023)
				nrdB	Nucelotide metabolism	Complement (18813-19535)
				Nrd barrel domain		Complement 20000-20917
Station102_MES_ALL_assembly_NODE_311_length_43652_cov_4	43.6kb	Prochlorococcus marinus	Caudovirales	carbohydrate metabolic process	Carbohydrate Metabolism	Complement 5307-5966	(Ruo Han Wang, 2023)
				PetE-PSII	Photosynthesis	Complement 28428-29501
				nrdB	Nucleotide Metabolism	Complement 32586-33302
				Nrd Barrel domain		Complement 33299-34675
Station137_MES_COMBINED_FINAL_NODE_867_length_52364_cov_12	52.3kb	Prochlorococcus marinus	Caudovirales	nrdB	Nucleotide Metabolism	2844-3560, 46608-47324	(Ruo Han Wang, 2023)
				Nrd Barrel domain		1477-2847, 45241-46611
Station124_MXL_ALL_assembly_NODE_210_length_48286_cov_6	48.2kb	Prochlorococcus marinus	Caudovirales	Thymidylate synthase	Nucleotide Metabolism	3675-3893	(Ruo Han Wang, 2023)
Station78_DCM_ALL_assembly_NODE_89_length_84324_cov_40	84.3kb	Prochlorococcus marinus	Caudovirales	6-phosphogluconolactonase activity	Phosphorus acquisition	4650-6113	(Ruo Han Wang, 2023)
				PetE-PSII	Photosynthesis	74057-75142
				Thymidylate Synthase	Nucleotide Metabolism	Complement 23434-24192
Station64_DCM_ALL_assembly_NODE_95_length_44481_cov_21	44.4kb	Prochlorococcus marinus	Caudovirales	nrdB	Nucleotide Metabolism	Complement 26745-27458	(Ruo Han Wang, 2023)
				nrd, barrel domain		Complement 27455-28837
				PetE-PSII	Photosynthesis	Complement 20354-21406
Station64_SUR_ALL_assembly_NODE_385_length_44594_cov_63	44.5kb	Prochlorococcus marinus	Caudovirales	Nrd, barrel domain	Nucleotide Metabolism	Complement 21773-23155	(Ruo Han Wang, 2023)
				nrdB		Complement 21063-21776
				PetE-PSII	Photosynthesis	Complement 14737-15789
Station34_DCM_ALL_assembly_NODE_161_length_50631_cov_29	50.6kb	Prochlorococcus marinus	Caudovirales	Thymidylate synthase	Nucleotide Metabolism	Complement 20863-21087	(Ruo Han Wang, 2023)
				Riboflavin kinase	Vitamin B12 Metabolism	Complement 22084-22722
Station58_DCM_ALL_assembly_NODE_96_length_46397_cov_12.671982	46.3kb	Prochlorococcus marinus	Caudovirales	PetE-PSII	Photosynthesis	Complement 2-931,	(Ruo Han Wang, 2023)
						Complement 46194-46397
				nrdB	Nucleotide metabolism	Complement 4672-5382
				Nrd barrel domain		Complement 5379-6122
Station122_SUR_ALL_assembly_NODE_188_length_45116_cov_12.940703	46.3kb	Prochlorococcus marinus	Caudovirales	nrdB	Nucleotide metabolism	Complement (2-139,	(Ruo Han Wang, 2023)
						41191-41913)
				Nrd barrel domain		Complement (136-1545, 41910-43319)
				PetE-PSII	Photosynthesis	Complement 35963-37045
Station46_SUR_ALL_assembly_NODE_288_length_42213_cov_13.314341	42.2kb	Prochlorococcus marinus	Caudovirales	nrdB	Nucleotide metabolism	34249-34965	(Ruo Han Wang, 2023)
				Nrd barrel domain		32876-34252
				PetE-PSII	Photosynthesis	38732-39808
